# Supplementary material
Source: PubMed Central journal article supplement (PMC1570432)
Supplement: 7601297s2.pdf [file 7601297s2.pdf]

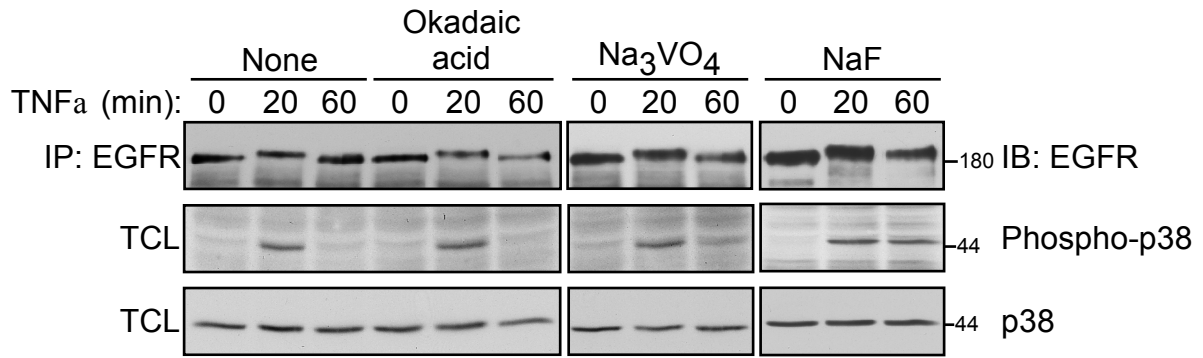

**Supplementary Figure 2** HeLa cells were left untreated, or pretreated for 30 minutes with Okadaic acid (0.1mM), Na<sub>3</sub>VO<sub>4</sub> (1mM), or NaF (5mM). Cells were then treated with TNF- $\alpha$  for the indicated time intervals in the absence or presence of the indicated inhibitors. Subsequently, cells were lysed and cleared lysates were analyzed by immunoblotting using the indicated antibodies.
